# Supplementary material for: N,N′-Methylenebis(N-(1,2,5-oxadiazol-3-yl)nitramide) derivatives as metal-free green primary explosives
Source: Royal Society of Chemistry journal article supplement (doi:10.1039/c8dt03042a), 2018-01-01
Supplement: c8dt03042a1.pdf [file c8dt03042a1.pdf]

## **Electronic Supporting Information**

### **N,N'-Methylenebis(N-(1,2,5-oxadiazol-3-yl)nitramide)**

### **Derivatives as Metal-free Green Primary Explosives**

Qiong Yu,<sup>a</sup> Gregory H. Imler,<sup>b</sup> Damon A. Parrish<sup>b</sup> and Jean'ne M. Shreeve\*<sup>a</sup>

<sup>a</sup> Department of Chemistry, University of Idaho, Moscow, ID 83844-2343 (USA)

E-mail: [jshreeve@uidaho.edu](mailto:jshreeve@uidaho.edu)

<sup>b</sup> Naval Research Laboratory, 4555 Overlook Avenue, Washington, D.C. 20375,  
United States

## Table of contents

|                                              |     |
|----------------------------------------------|-----|
| Crystallographic data                        | S2  |
| Theoretical calculations                     | S9  |
| $^1\text{H}$ and $^{13}\text{C}$ NMR spectra | S10 |
| References                                   | S19 |

## Crystallographic data

**Table S1.** Selected crystal parameters of **6**.

|                                                  |                                                                             |
|--------------------------------------------------|-----------------------------------------------------------------------------|
| Empirical formula                                | C <sub>7</sub> H <sub>10</sub> N <sub>14</sub> O <sub>16</sub> ( <b>6</b> ) |
| CCDC Number                                      | 1846164                                                                     |
| Formula weight                                   | 546.29                                                                      |
| Temperature/K                                    | 150(2)                                                                      |
| Crystal system                                   | monoclinic                                                                  |
| Space group                                      | P2 <sub>1</sub> /n                                                          |
| a/Å                                              | 11.8644(10)                                                                 |
| b/Å                                              | 12.1879(10)                                                                 |
| c/Å                                              | 19.9991(16)                                                                 |
| $\alpha$ /°                                      | 90                                                                          |
| $\beta$ /°                                       | 98.3080(10)                                                                 |
| $\gamma$ /°                                      | 90                                                                          |
| Volume/Å <sup>3</sup>                            | 1892.8(3)                                                                   |
| Z                                                | 4                                                                           |
| $\rho_{\text{calc}}$ g/cm <sup>3</sup> (-123 °C) | 1.917                                                                       |
| $\rho_{\text{calc}}$ g/cm <sup>3</sup> (20 °C)   | 1.886                                                                       |
| $\mu$ /mm <sup>-1</sup>                          | 0.186                                                                       |
| F(000)                                           | 1112                                                                        |
| Crystal size/mm <sup>3</sup>                     | 0.330 x 0.145 x 0.117                                                       |
| $\theta$ range/°                                 | 3.153 - 30.027                                                              |
| Reflections collected                            | 20793                                                                       |
| Independent reflections                          | 5335 [ $R_{\text{int}} = 0.0367$ ]                                          |
| Data/restraints/parameters                       | 5335/0/342                                                                  |
| Goodness-of-fit on F <sup>2</sup>                | 1.018                                                                       |
| Final R indexes [ $I \geq 2\sigma(I)$ ]          | $R_1 = 0.0373$ , $wR_2 = 0.0847$                                            |
| Final R indexes [all data]                       | $R_1 = 0.0575$ , $wR_2 = 0.0932$                                            |
| Largest diff. peak/hole / e Å <sup>-3</sup>      | 0.377/-0.306                                                                |

**Figures S1 to S6**

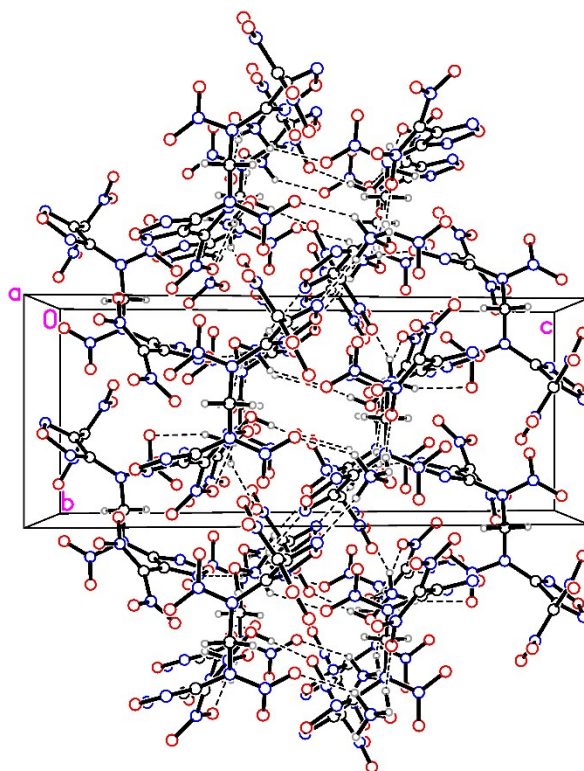

**Fig. S1.** Unit cell view for **6** along *a* axis, hydrogen bonds are marked as dotted lines.

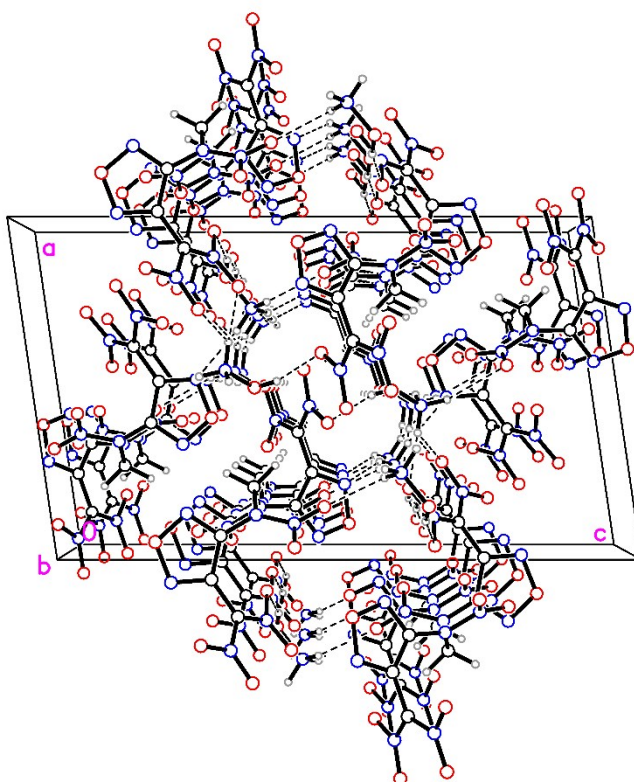

**Fig. S2.** Unit cell view for **6** along *b* axis, hydrogen bonds are marked as dotted lines.

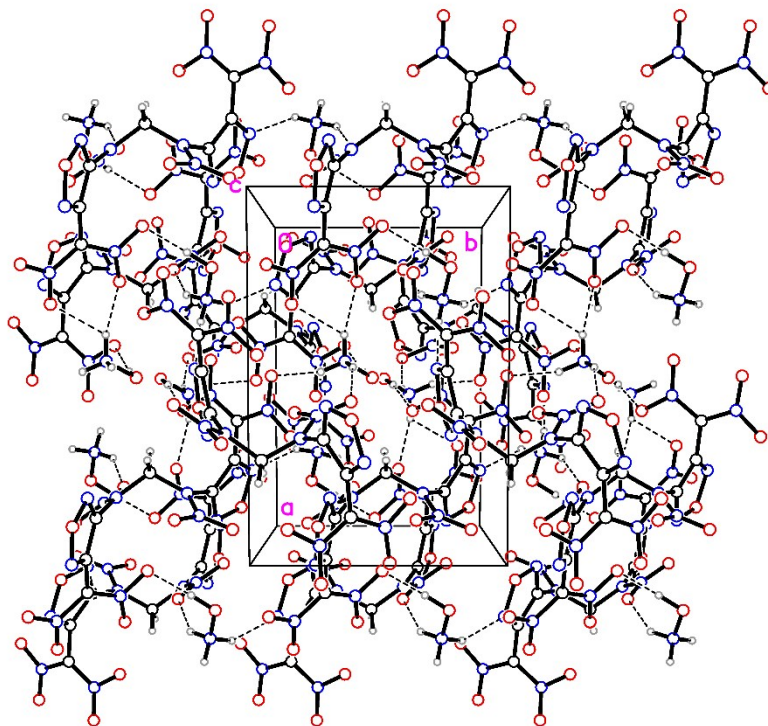

**Fig. S3.** Unit cell view for **6** along *c* axis, hydrogen bonds are marked as dotted lines.

**Table S2.** Atomic coordinates ( $\times 10^4$ ) and equivalent isotropic displacement parameters ( $\text{\AA}^2 \times 10^3$ ) for **6**.  $U(\text{eq})$  is defined as one third of the trace of the orthogonalized  $U^{\text{ij}}$  tensor.

|       | x        | y       | z       |
|-------|----------|---------|---------|
| O(1)  | 11818(1) | 449(1)  | 7504(1) |
| O(2)  | 12887(1) | 1397(1) | 6803(1) |
| N(3)  | 12019(1) | 1475(2) | 7074(1) |
| C(4)  | 11203(1) | 2751(2) | 6909(1) |
| N(5)  | 11379(1) | 4011(1) | 6481(1) |
| O(6)  | 12197(1) | 4101(1) | 6151(1) |
| O(7)  | 10637(1) | 5161(1) | 6422(1) |
| C(8)  | 10195(1) | 2807(2) | 7245(1) |
| N(9)  | 10255(1) | 2421(2) | 7884(1) |
| O(10) | 9161(1)  | 2536(1) | 8043(1) |
| N(11) | 8406(1)  | 2995(1) | 7488(1) |
| C(12) | 9016(1)  | 3188(2) | 7002(1) |
| N(13) | 8471(1)  | 3874(1) | 6398(1) |
| N(14) | 8689(1)  | 3196(2) | 5796(1) |
| O(15) | 9283(1)  | 1959(1) | 5836(1) |
| O(16) | 8255(1)  | 3906(1) | 5281(1) |
| C(17) | 7745(1)  | 5324(2) | 6386(1) |
| N(18) | 8351(1)  | 6893(1) | 6358(1) |
| N(19) | 8956(1)  | 7491(2) | 6952(1) |

|       |         |          |         |
|-------|---------|----------|---------|
| O(20) | 9033(1) | 6568(1)  | 7440(1) |
| O(21) | 9356(1) | 8889(1)  | 6943(1) |
| C(22) | 8350(1) | 7847(2)  | 5770(1) |
| N(23) | 9238(1) | 7960(2)  | 5459(1) |
| O(24) | 8901(1) | 8971(1)  | 4918(1) |
| N(25) | 7777(1) | 9451(2)  | 4896(1) |
| C(26) | 7426(1) | 8771(2)  | 5421(1) |
| C(27) | 6257(1) | 8917(2)  | 5555(1) |
| N(28) | 5939(1) | 10264(1) | 5918(1) |
| O(29) | 6709(1) | 11256(1) | 6135(1) |
| O(30) | 4937(1) | 10454(1) | 6024(1) |
| N(31) | 5506(1) | 7713(1)  | 5295(1) |
| O(32) | 5971(1) | 6486(1)  | 5033(1) |
| O(33) | 4465(1) | 7758(1)  | 5299(1) |
| N(34) | 2721(1) | 7729(2)  | 6024(1) |
| O(35) | 1816(1) | 8025(2)  | 6377(1) |
| N(36) | 5484(1) | 6396(1)  | 3448(1) |
| O(37) | 5016(1) | 5259(1)  | 3865(1) |

**Table S3.** Bond lengths [ $\text{\AA}$ ] and angles [ $^\circ$ ] for **6**.

|              |            |              |            |
|--------------|------------|--------------|------------|
| O(1)-N(3)    | 1.2410(16) | O(2)-N(3)    | 1.2325(16) |
| N(3)-C(4)    | 1.4182(18) | C(4)-N(5)    | 1.3648(17) |
| C(4)-C(8)    | 1.4537(19) | N(5)-O(6)    | 1.2519(15) |
| N(5)-O(7)    | 1.2724(15) | C(8)-N(9)    | 1.3080(17) |
| C(8)-C(12)   | 1.4460(19) | N(9)-O(10)   | 1.3829(16) |
| O(10)-N(11)  | 1.3733(15) | N(11)-C(12)  | 1.3014(18) |
| C(12)-N(13)  | 1.3982(17) | N(13)-N(14)  | 1.3797(16) |
| N(13)-C(17)  | 1.4507(17) | N(14)-O(15)  | 1.2177(15) |
| N(14)-O(16)  | 1.2250(15) | C(17)-N(18)  | 1.4600(17) |
| C(17)-H(17A) | 0.9900     | C(17)-H(17B) | 0.9900     |
| N(18)-N(19)  | 1.3828(16) | N(18)-C(22)  | 1.4056(17) |
| N(19)-O(20)  | 1.2208(15) | N(19)-O(21)  | 1.2241(15) |
| C(22)-N(23)  | 1.3008(19) | C(22)-C(26)  | 1.4221(19) |
| N(23)-O(24)  | 1.3687(16) | O(24)-N(25)  | 1.3830(16) |
| N(25)-C(26)  | 1.3049(17) | C(26)-C(27)  | 1.4555(19) |
| C(27)-N(31)  | 1.3687(17) | C(27)-N(28)  | 1.3880(17) |
| N(28)-O(29)  | 1.2437(16) | N(28)-O(30)  | 1.2477(15) |
| N(31)-O(33)  | 1.2357(15) | N(31)-O(32)  | 1.2807(15) |
| N(34)-O(35)  | 1.3882(17) | N(34)-H(34A) | 0.9100     |
| N(34)-H(34B) | 0.9100     | N(34)-H(34C) | 0.9100     |
| O(35)-H(35)  | 0.98(2)    | N(36)-O(37)  | 1.4068(15) |
| N(36)-H(36A) | 0.9100     | N(36)-H(36B) | 0.9100     |

|                     |            |                     |            |
|---------------------|------------|---------------------|------------|
| N(36)-H(36C)        | 0.9100     | O(37)-H(37)         | 0.82(2)    |
| O(2)-N(3)-O(1)      | 121.73(12) | O(2)-N(3)-C(4)      | 121.42(12) |
| O(1)-N(3)-C(4)      | 116.84(12) | N(5)-C(4)-N(3)      | 121.60(12) |
| N(5)-C(4)-C(8)      | 118.53(12) | N(3)-C(4)-C(8)      | 119.68(12) |
| O(6)-N(5)-O(7)      | 119.21(11) | O(6)-N(5)-C(4)      | 125.12(12) |
| O(7)-N(5)-C(4)      | 115.68(12) | N(9)-C(8)-C(12)     | 106.97(12) |
| N(9)-C(8)-C(4)      | 120.76(12) | C(12)-C(8)-C(4)     | 132.25(12) |
| C(8)-N(9)-O(10)     | 106.78(11) | N(11)-O(10)-N(9)    | 110.87(10) |
| C(12)-N(11)-O(10)   | 105.53(11) | N(11)-C(12)-N(13)   | 117.01(12) |
| N(11)-C(12)-C(8)    | 109.84(12) | N(13)-C(12)-C(8)    | 132.67(12) |
| N(14)-N(13)-C(12)   | 118.39(11) | N(14)-N(13)-C(17)   | 119.37(11) |
| C(12)-N(13)-C(17)   | 122.14(11) | O(15)-N(14)-O(16)   | 127.34(12) |
| O(15)-N(14)-N(13)   | 116.56(11) | O(16)-N(14)-N(13)   | 116.10(12) |
| N(13)-C(17)-N(18)   | 113.85(11) | N(13)-C(17)-H(17A)  | 108.8      |
| N(18)-C(17)-H(17A)  | 108.8      | N(13)-C(17)-H(17B)  | 108.8      |
| N(18)-C(17)-H(17B)  | 108.8      | H(17A)-C(17)-H(17B) | 107.7      |
| N(19)-N(18)-C(22)   | 117.78(11) | N(19)-N(18)-C(17)   | 117.77(11) |
| C(22)-N(18)-C(17)   | 124.44(11) | O(20)-N(19)-O(21)   | 126.03(12) |
| O(20)-N(19)-N(18)   | 116.39(11) | O(21)-N(19)-N(18)   | 117.58(11) |
| N(23)-C(22)-N(18)   | 122.35(13) | N(23)-C(22)-C(26)   | 110.44(12) |
| N(18)-C(22)-C(26)   | 127.19(13) | C(22)-N(23)-O(24)   | 104.78(11) |
| N(23)-O(24)-N(25)   | 111.23(10) | C(26)-N(25)-O(24)   | 105.96(11) |
| N(25)-C(26)-C(22)   | 107.59(12) | N(25)-C(26)-C(27)   | 122.53(12) |
| C(22)-C(26)-C(27)   | 129.76(12) | N(31)-C(27)-N(28)   | 122.86(12) |
| N(31)-C(27)-C(26)   | 117.28(12) | N(28)-C(27)-C(26)   | 119.83(12) |
| O(29)-N(28)-O(30)   | 122.05(12) | O(29)-N(28)-C(27)   | 116.45(12) |
| O(30)-N(28)-C(27)   | 121.50(12) | O(33)-N(31)-O(32)   | 120.99(11) |
| O(33)-N(31)-C(27)   | 124.96(12) | O(32)-N(31)-C(27)   | 114.05(12) |
| O(35)-N(34)-H(34A)  | 109.5      | O(35)-N(34)-H(34B)  | 109.5      |
| H(34A)-N(34)-H(34B) | 109.5      | O(35)-N(34)-H(34C)  | 109.5      |
| H(34A)-N(34)-H(34C) | 109.5      | H(34B)-N(34)-H(34C) | 109.5      |
| N(34)-O(35)-H(35)   | 102.4(13)  | O(37)-N(36)-H(36A)  | 109.5      |
| O(37)-N(36)-H(36B)  | 109.5      | H(36A)-N(36)-H(36B) | 109.5      |
| O(37)-N(36)-H(36C)  | 109.5      | H(36A)-N(36)-H(36C) | 109.5      |
| H(36B)-N(36)-H(36C) | 109.5      | N(36)-O(37)-H(37)   | 103.3(15)  |

**Table S4.** Anisotropic displacement parameters ( $\text{\AA}^2 \times 10^3$ ) for **6**. The anisotropic displacement factor exponent takes the form:  $-2\pi^2[h^2 a^* 2 U^{11} + \dots + 2 h k a^* b^* U^{12}]$

|      | U <sup>11</sup> | U <sup>22</sup> | U <sup>33</sup> | U <sup>23</sup> | U <sup>13</sup> |
|------|-----------------|-----------------|-----------------|-----------------|-----------------|
| O(1) | 26(1)           | 27(1)           | 31(1)           | 16(1)           | 11(1)           |
| O(2) | 17(1)           | 22(1)           | 47(1)           | 9(1)            | 17(1)           |
| N(3) | 13(1)           | 16(1)           | 20(1)           | 3(1)            | 4(1)            |

|       |       |       |       |       |       |
|-------|-------|-------|-------|-------|-------|
| C(4)  | 11(1) | 15(1) | 14(1) | 3(1)  | 2(1)  |
| N(5)  | 11(1) | 16(1) | 16(1) | 2(1)  | 2(1)  |
| O(6)  | 13(1) | 26(1) | 19(1) | 6(1)  | 7(1)  |
| O(7)  | 14(1) | 17(1) | 32(1) | 9(1)  | 7(1)  |
| C(8)  | 12(1) | 11(1) | 14(1) | 1(1)  | 1(1)  |
| N(9)  | 13(1) | 21(1) | 16(1) | 3(1)  | 4(1)  |
| O(10) | 15(1) | 25(1) | 15(1) | 7(1)  | 5(1)  |
| N(11) | 14(1) | 17(1) | 16(1) | 4(1)  | 2(1)  |
| C(12) | 12(1) | 10(1) | 14(1) | 1(1)  | 1(1)  |
| N(13) | 13(1) | 13(1) | 11(1) | 0(1)  | 1(1)  |
| N(14) | 15(1) | 18(1) | 14(1) | -2(1) | 1(1)  |
| O(15) | 21(1) | 19(1) | 23(1) | -6(1) | 4(1)  |
| O(16) | 30(1) | 31(1) | 12(1) | 2(1)  | -2(1) |
| C(17) | 10(1) | 13(1) | 17(1) | 1(1)  | 0(1)  |
| N(18) | 17(1) | 13(1) | 13(1) | 1(1)  | -4(1) |
| N(19) | 15(1) | 16(1) | 16(1) | -2(1) | -1(1) |
| O(20) | 23(1) | 20(1) | 14(1) | 3(1)  | -2(1) |
| O(21) | 37(1) | 17(1) | 25(1) | -1(1) | -3(1) |
| C(22) | 12(1) | 13(1) | 14(1) | -1(1) | 1(1)  |
| N(23) | 16(1) | 19(1) | 21(1) | 2(1)  | 3(1)  |
| O(24) | 15(1) | 25(1) | 20(1) | 4(1)  | 7(1)  |
| N(25) | 14(1) | 18(1) | 16(1) | 2(1)  | 4(1)  |
| C(26) | 13(1) | 12(1) | 12(1) | -1(1) | 2(1)  |
| C(27) | 12(1) | 12(1) | 12(1) | 0(1)  | 2(1)  |
| N(28) | 16(1) | 15(1) | 13(1) | 1(1)  | 3(1)  |
| O(29) | 24(1) | 22(1) | 26(1) | -9(1) | 3(1)  |
| O(30) | 16(1) | 23(1) | 24(1) | -1(1) | 8(1)  |
| N(31) | 13(1) | 14(1) | 12(1) | 3(1)  | 1(1)  |
| O(32) | 18(1) | 14(1) | 19(1) | -4(1) | 2(1)  |
| O(33) | 10(1) | 22(1) | 26(1) | 3(1)  | 3(1)  |
| N(34) | 18(1) | 19(1) | 15(1) | 1(1)  | 1(1)  |
| O(35) | 30(1) | 26(1) | 51(1) | -6(1) | 23(1) |
| N(36) | 16(1) | 16(1) | 15(1) | 1(1)  | 3(1)  |
| O(37) | 39(1) | 21(1) | 15(1) | -3(1) | 7(1)  |

**Table S5.** Hydrogen coordinates ( $\times 10^4$ ) and isotropic displacement parameters ( $\text{\AA}^2 \times 10^3$ ) for **6**.

|        | x    | y    | z    |
|--------|------|------|------|
| H(17A) | 7365 | 5318 | 6796 |
| H(17B) | 7144 | 5251 | 5989 |
| H(34A) | 2833 | 8634 | 5769 |
| H(34B) | 2561 | 6834 | 5750 |
| H(34C) | 3362 | 7527 | 6321 |



|        |          |          |          |
|--------|----------|----------|----------|
| H(35)  | 1380(20) | 6990(30) | 6307(11) |
| H(36A) | 5184     | 7421     | 3497     |
| H(36B) | 5318     | 6069     | 3009     |
| H(36C) | 6253     | 6436     | 3568     |
| H(37)  | 5191(18) | 5650(30) | 4243(11) |

**Table S6.** Torsion angles [°] for **6**.

|                         |             |                         |             |
|-------------------------|-------------|-------------------------|-------------|
| O(2)-N(3)-C(4)-N(5)     | -4.6(2)     | O(1)-N(3)-C(4)-N(5)     | 175.09(13)  |
| O(2)-N(3)-C(4)-C(8)     | -179.44(13) | O(1)-N(3)-C(4)-C(8)     | 0.27(19)    |
| N(3)-C(4)-N(5)-O(6)     | 6.5(2)      | C(8)-C(4)-N(5)-O(6)     | -178.61(12) |
| N(3)-C(4)-N(5)-O(7)     | -173.62(12) | C(8)-C(4)-N(5)-O(7)     | 1.25(18)    |
| N(5)-C(4)-C(8)-N(9)     | -137.34(14) | N(3)-C(4)-C(8)-N(9)     | 37.64(19)   |
| N(5)-C(4)-C(8)-C(12)    | 44.8(2)     | N(3)-C(4)-C(8)-C(12)    | -140.20(14) |
| C(12)-C(8)-N(9)-O(10)   | 0.49(14)    | C(4)-C(8)-N(9)-O(10)    | -177.84(11) |
| C(8)-N(9)-O(10)-N(11)   | 0.33(14)    | N(9)-O(10)-N(11)-C(12)  | -1.08(14)   |
| O(10)-N(11)-C(12)-N(13) | -171.72(11) | O(10)-N(11)-C(12)-C(8)  | 1.36(14)    |
| N(9)-C(8)-C(12)-N(11)   | -1.21(15)   | C(4)-C(8)-C(12)-N(11)   | 176.85(14)  |
| N(9)-C(8)-C(12)-N(13)   | 170.39(14)  | C(4)-C(8)-C(12)-N(13)   | -11.5(2)    |
| N(11)-C(12)-N(13)-N(14) | -137.96(13) | C(8)-C(12)-N(13)-N(14)  | 50.9(2)     |
| N(11)-C(12)-N(13)-C(17) | 45.81(18)   | C(8)-C(12)-N(13)-C(17)  | -125.32(16) |
| C(12)-N(13)-N(14)-O(15) | 5.21(18)    | C(17)-N(13)-N(14)-O(15) | -178.45(12) |
| C(12)-N(13)-N(14)-O(16) | -175.18(12) | C(17)-N(13)-N(14)-O(16) | 1.15(18)    |
| N(14)-N(13)-C(17)-N(18) | -86.79(14)  | C(12)-N(13)-C(17)-N(18) | 89.40(15)   |
| N(13)-C(17)-N(18)-N(19) | -78.96(15)  | N(13)-C(17)-N(18)-C(22) | 101.82(15)  |
| C(22)-N(18)-N(19)-O(20) | -173.26(12) | C(17)-N(18)-N(19)-O(20) | 7.47(18)    |
| C(22)-N(18)-N(19)-O(21) | 7.28(19)    | C(17)-N(18)-N(19)-O(21) | -172.00(12) |
| N(19)-N(18)-C(22)-N(23) | 72.86(17)   | C(17)-N(18)-C(22)-N(23) | -107.91(16) |
| N(19)-N(18)-C(22)-C(26) | -108.60(16) | C(17)-N(18)-C(22)-C(26) | 70.62(19)   |
| N(18)-C(22)-N(23)-O(24) | 179.59(12)  | C(26)-C(22)-N(23)-O(24) | 0.84(15)    |
| C(22)-N(23)-O(24)-N(25) | -1.09(14)   | N(23)-O(24)-N(25)-C(26) | 0.91(14)    |
| O(24)-N(25)-C(26)-C(22) | -0.36(14)   | O(24)-N(25)-C(26)-C(27) | -176.71(11) |
| N(23)-C(22)-C(26)-N(25) | -0.32(16)   | N(18)-C(22)-C(26)-N(25) | -178.99(13) |
| N(23)-C(22)-C(26)-C(27) | 175.68(13)  | N(18)-C(22)-C(26)-C(27) | -3.0(2)     |
| N(25)-C(26)-C(27)-N(31) | 90.92(16)   | C(22)-C(26)-C(27)-N(31) | -84.54(18)  |
| N(25)-C(26)-C(27)-N(28) | -87.34(17)  | C(22)-C(26)-C(27)-N(28) | 97.19(17)   |
| N(31)-C(27)-N(28)-O(29) | 178.91(12)  | C(26)-C(27)-N(28)-O(29) | -2.93(18)   |
| N(31)-C(27)-N(28)-O(30) | -0.4(2)     | C(26)-C(27)-N(28)-O(30) | 177.80(11)  |
| N(28)-C(27)-N(31)-O(33) | 6.8(2)      | C(26)-C(27)-N(31)-O(33) | -171.42(12) |
| N(28)-C(27)-N(31)-O(32) | -173.56(12) | C(26)-C(27)-N(31)-O(32) | 8.24(17)    |

**Table S7.** Hydrogen bonds for **6** [Å and °].

| D-H...A | d(D-H) | d(H...A) | d(D...A) |
|---------|--------|----------|----------|
|---------|--------|----------|----------|

|                        |         |         |            |
|------------------------|---------|---------|------------|
| N(34)-H(34A)...N(25)#3 | 0.91    | 2.10    | 2.9295(17) |
| N(34)-H(34B)...O(16)#2 | 0.91    | 2.23    | 3.0028(16) |
| N(34)-H(34C)...N(9)#1  | 0.91    | 2.12    | 3.0146(18) |
| O(35)-H(35)...O(7)#4   | 0.98(2) | 1.75(2) | 2.7076(16) |
| N(36)-H(36A)...O(30)#3 | 0.91    | 1.98    | 2.8219(16) |
| N(36)-H(36B)...O(21)#5 | 0.91    | 2.27    | 3.1201(16) |
| N(36)-H(36C)...O(2)#7  | 0.91    | 2.21    | 2.7266(16) |
| N(36)-H(36C)...O(6)#7  | 0.91    | 1.89    | 2.7816(16) |
| O(37)-H(37)...O(32)    | 0.82(2) | 1.84(2) | 2.6371(15) |

Symmetry transformations used to generate equivalent atoms:

#1  $-x+3/2, y+1/2, -z+3/2$  #2  $-x+1, -y+1, -z+1$  #3  $-x+1, -y+2, -z+1$

#4  $x-1, y, z$  #5  $x-1/2, -y+3/2, z-1/2$  #6  $x-1/2, -y+1/2, z-1/2$

#7  $-x+2, -y+1, -z+1$

### Theoretical calculations

As mentioned in the manuscript, the heats of formation were determined using isodesmic reactions (**Scheme S1**). The calculations were carried out using Gaussian 03 (Revision D.01) suite of programs.<sup>1</sup> The geometric optimization and frequency analyses of the structures were calculated using B3LYP/6-31+G\*\* level,<sup>2</sup> and single energy points were calculated at the MP2/6-311++G\*\* level.<sup>3</sup> The heats of formation for the cations were obtained by an atomization approach using G2 ab initio method.<sup>4</sup> The heats of formation of other compounds in Scheme S1 were obtained from the NIST WebBook.<sup>5</sup>

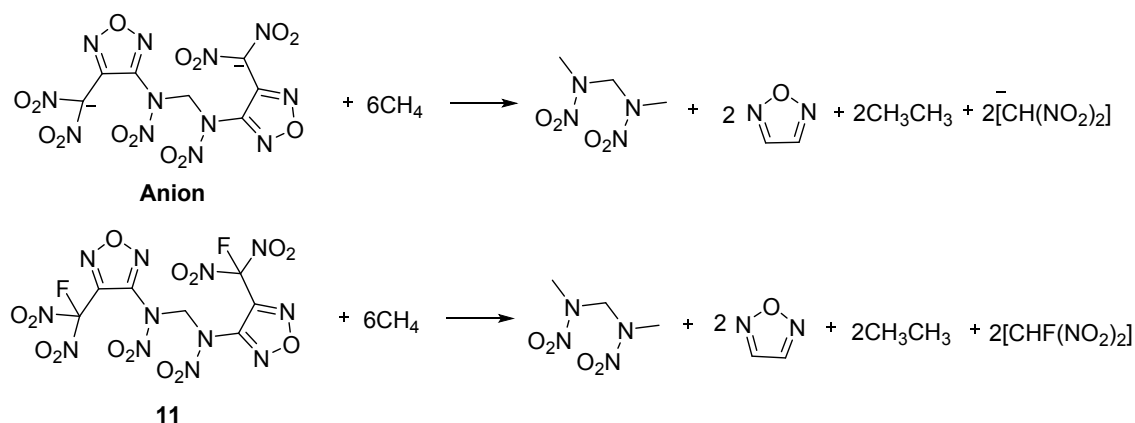

**Scheme S1.** Isodesmic reactions.

**Table S8** The heats of formation (HOF) for bis(2,5-dinitromethyl)-1,3,4-oxadiazole anion and **11**.<sup>[a]</sup>

| Compounds    | ZPE<br>[Hartree/Particle] | Hcorr<br>[Hartree/Particle] | Mp-6-311++g**<br>[Hartree/Particle] | HoF(gas)<br>[kJ mol <sup>-1</sup> ] |
|--------------|---------------------------|-----------------------------|-------------------------------------|-------------------------------------|
| <b>Anion</b> | 0.17775                   | 0.206862                    | -1973.2013768                       | -784.8165576                        |
| <b>11</b>    | 0.18574                   | 0.217373                    | -2172.4104146                       | 298.1216829                         |

[a] The enthalpy of sublimation was calculated by using Trouton's rule. Solid-state heats of formation of the resulting compounds were calculated with Equation (1) in which  $T_m$  is the melting temperature.  $\Delta H_f = \Delta H_f(g) - \Delta H_{sub} = \Delta H_f(g) - 188[\text{J mol}^{-1} \text{K}^{-1}] \times T_m$  (1).

### <sup>1</sup>H and <sup>13</sup>C NMR spectra

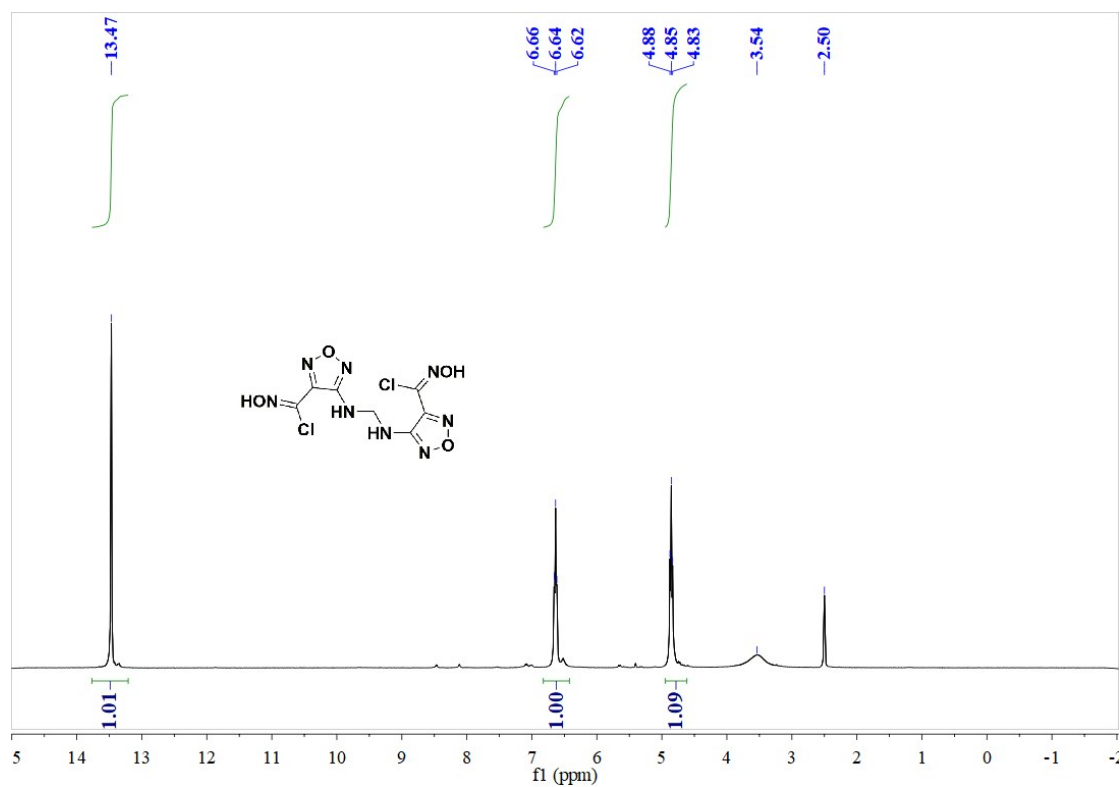

**Fig S4** <sup>1</sup>H-NMR spectrum of **1** in *d*<sub>6</sub>-DMSO.

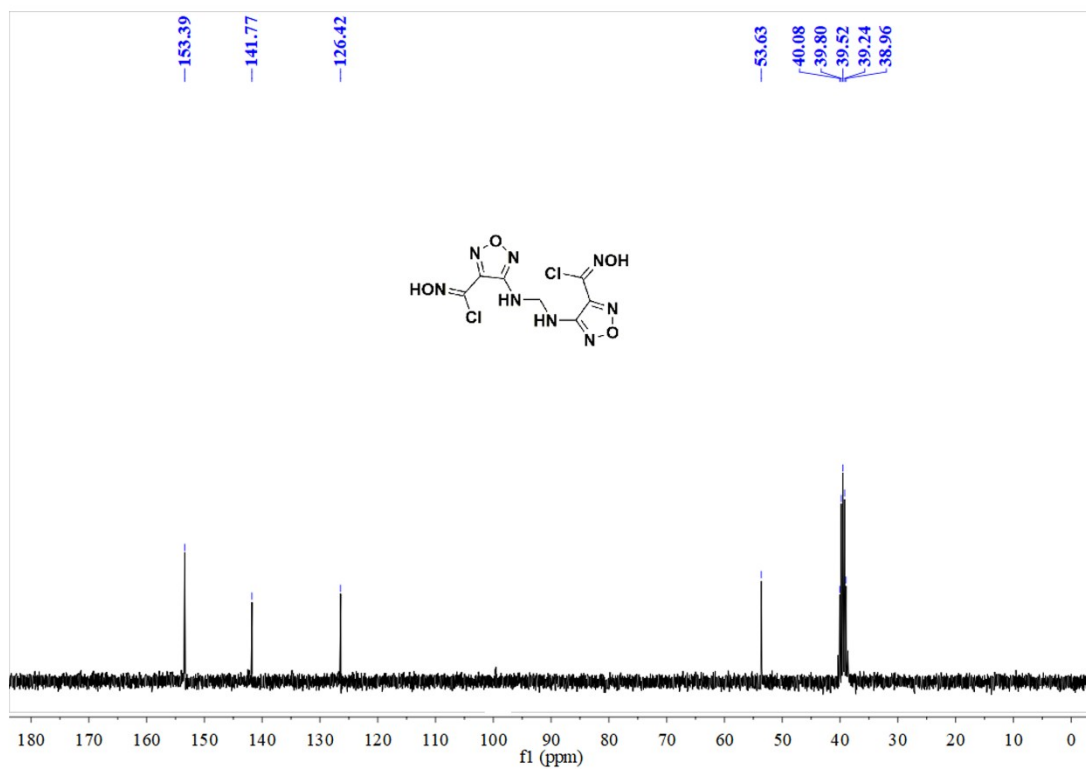

Fig S5  $^{13}\text{C}$ -NMR spectrum of **1** in  $d_6$ -DMSO.

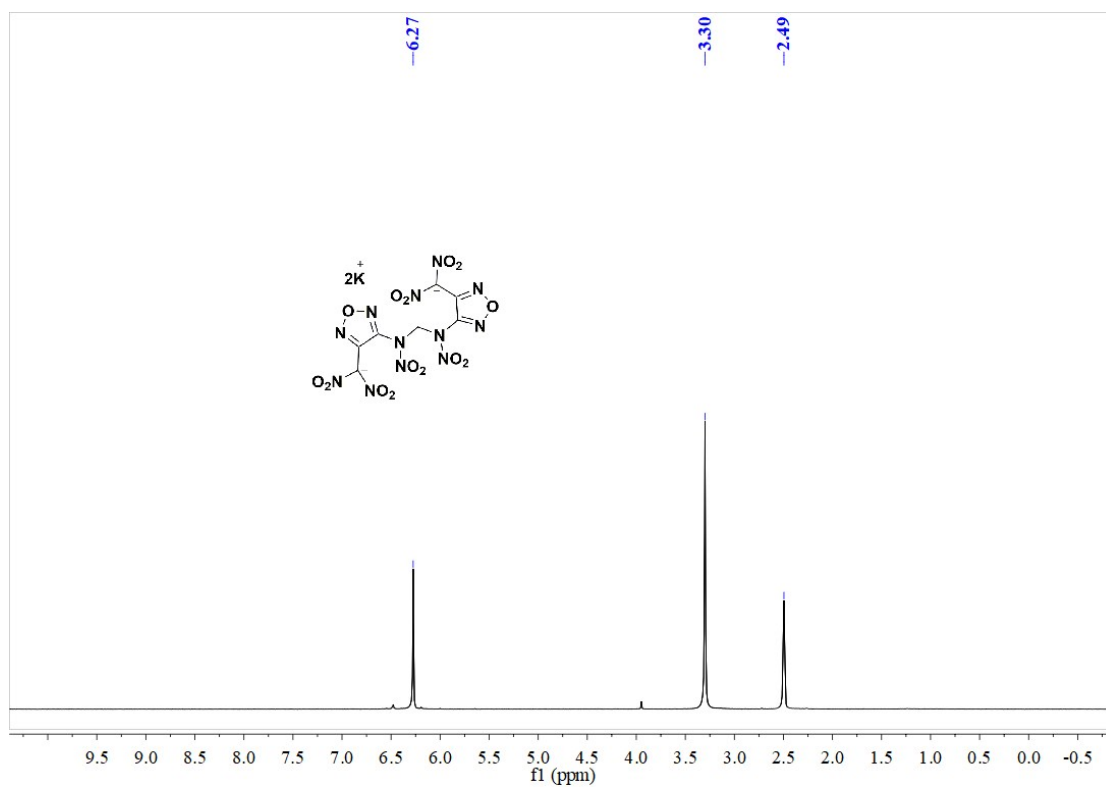

Fig S6  $^1\text{H}$ -NMR spectrum of **3** in  $d_6$ -DMSO.

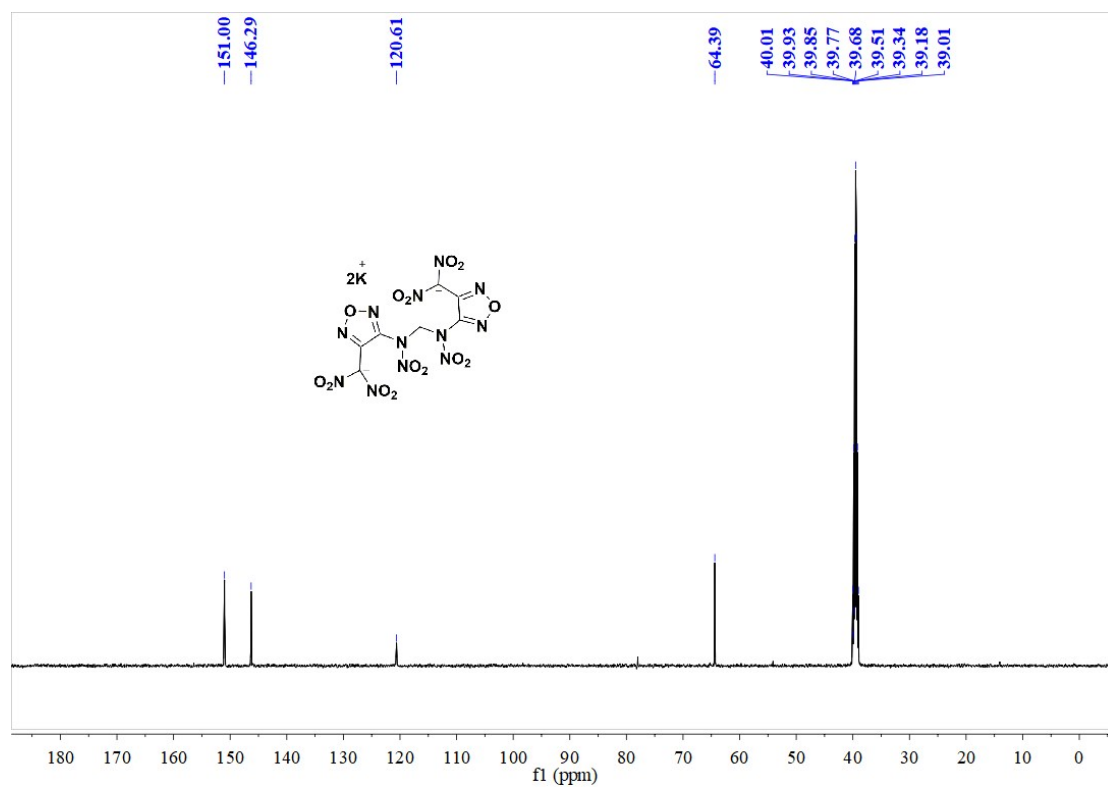

Fig S7 <sup>13</sup>C-NMR spectrum of **3** in *d*<sub>6</sub>-DMSO.

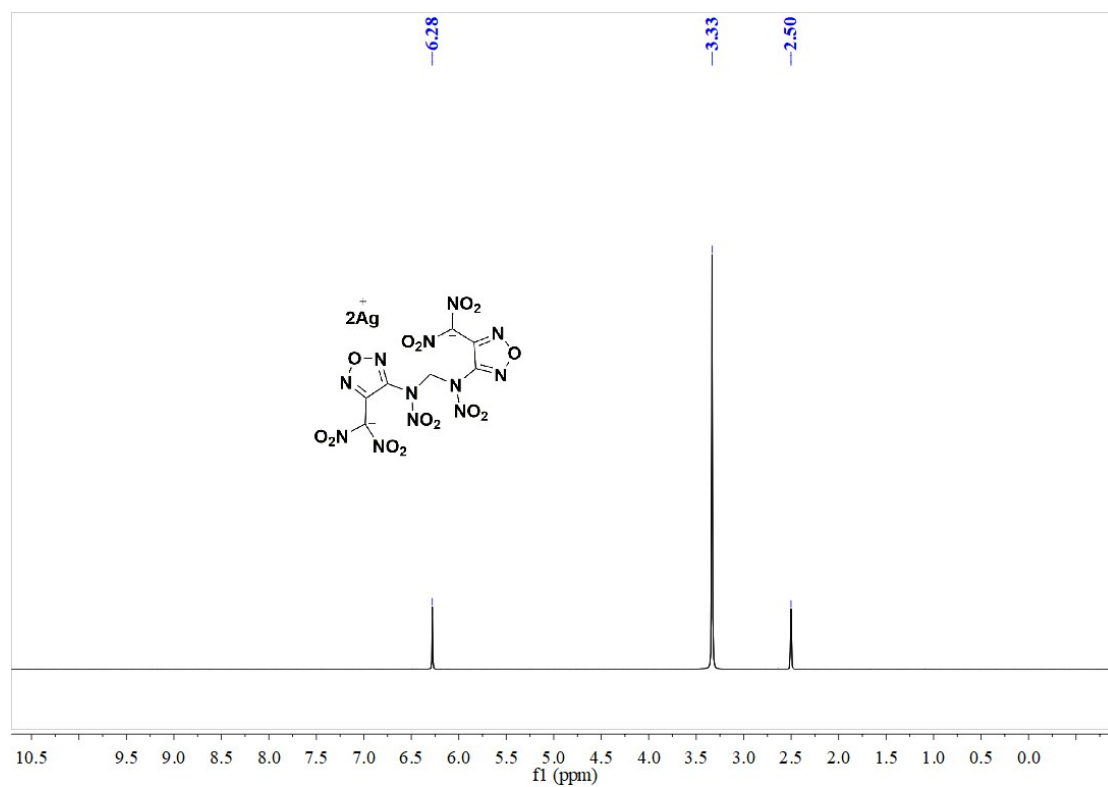

Fig S8 <sup>1</sup>H-NMR spectrum of **5** in *d*<sub>6</sub>-DMSO.



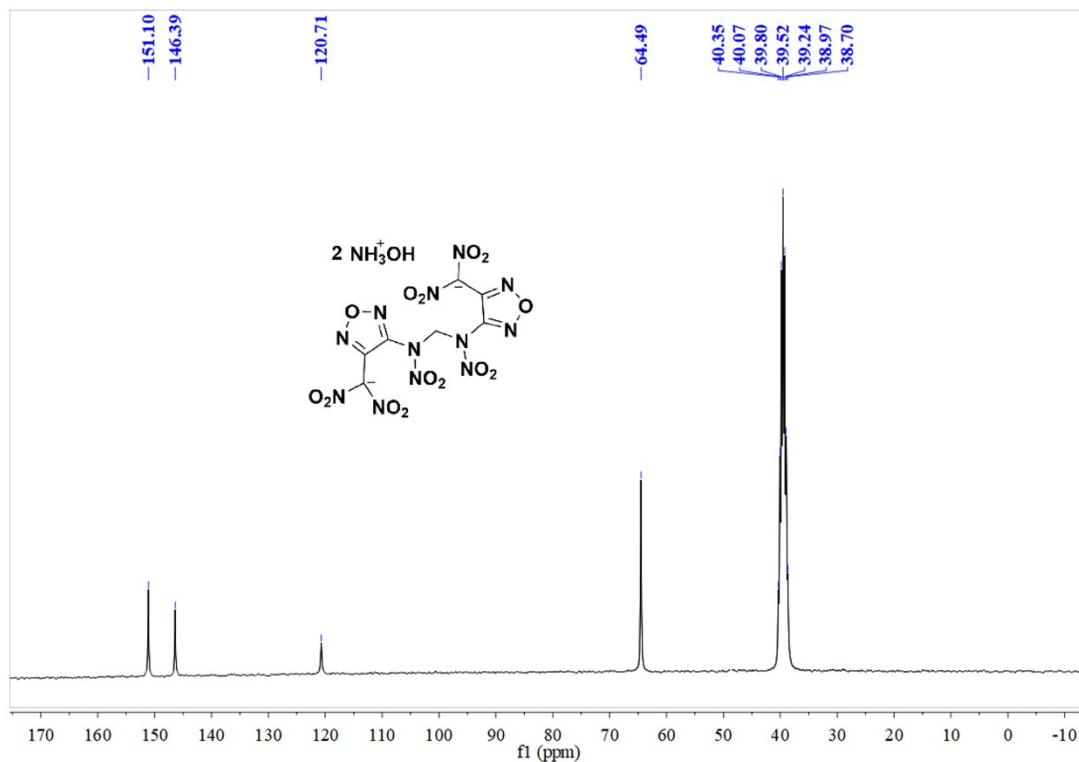

Fig S11  $^{13}\text{C-NMR}$  spectrum of 6 in  $d_6\text{-DMSO}$ .

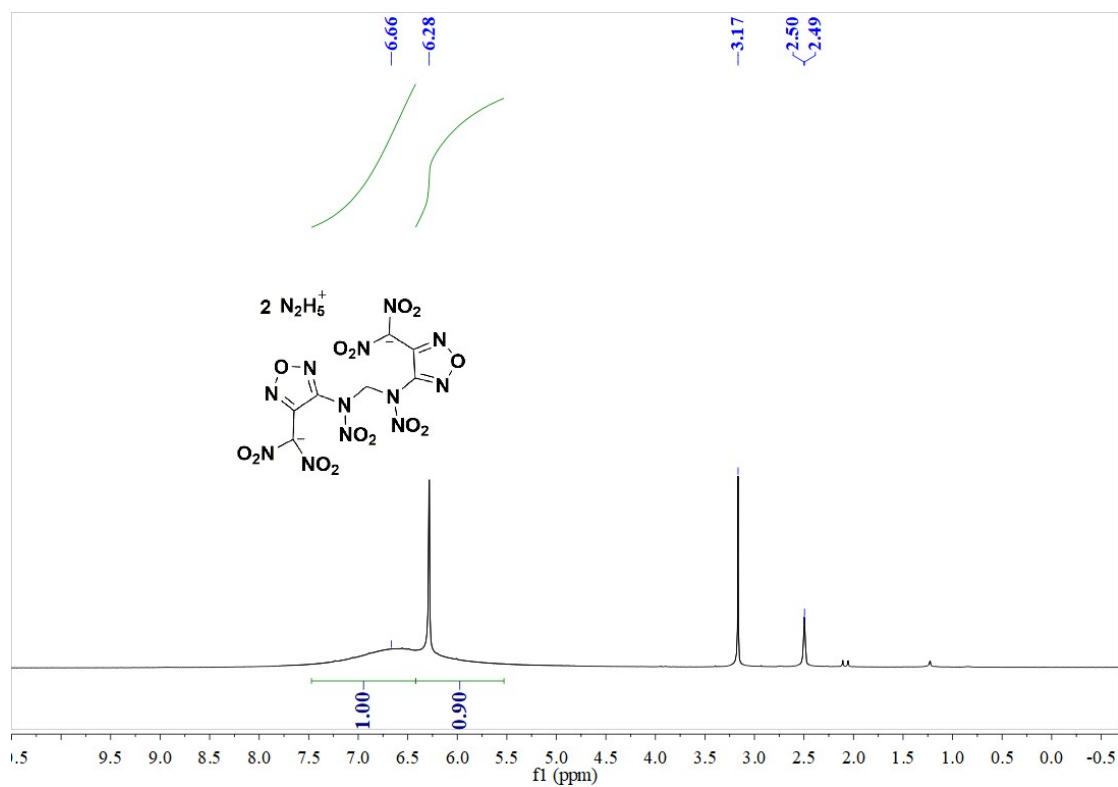

Fig S12  $^1\text{H-NMR}$  spectrum of 7 in  $d_6\text{-DMSO}$ .

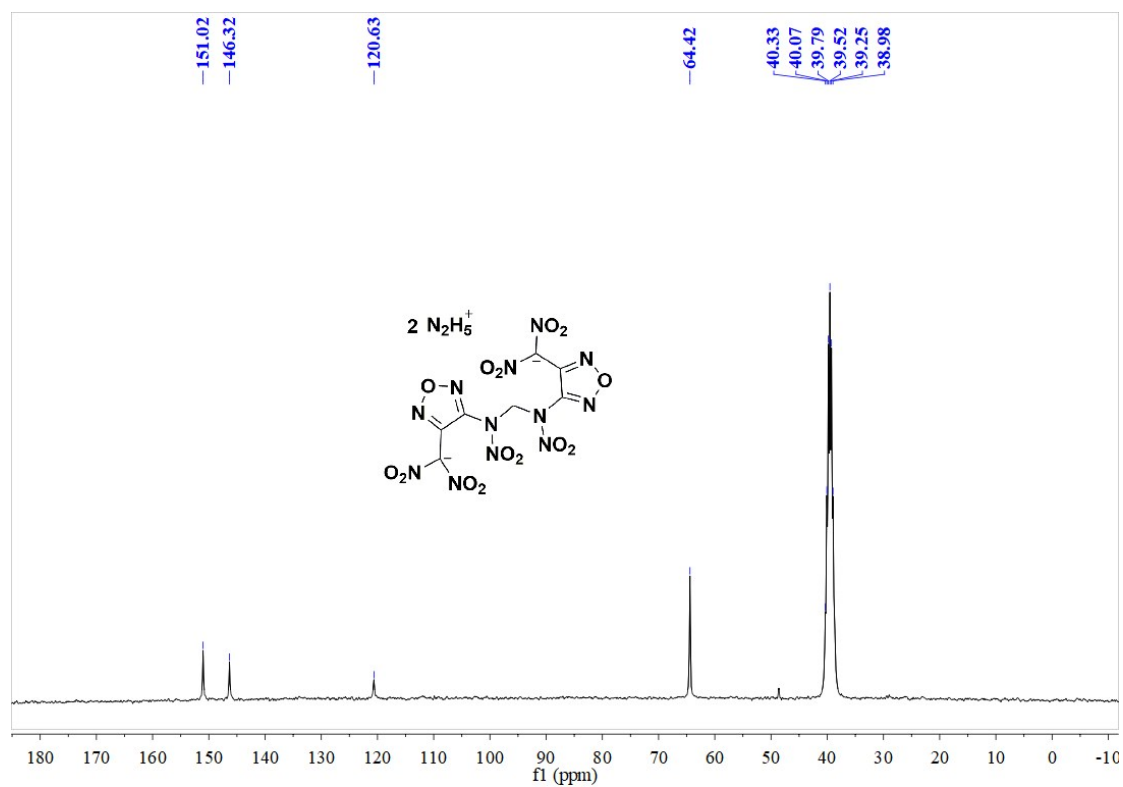

Fig S13 <sup>13</sup>C-NMR spectrum of **7** in *d*<sub>6</sub>-DMSO.

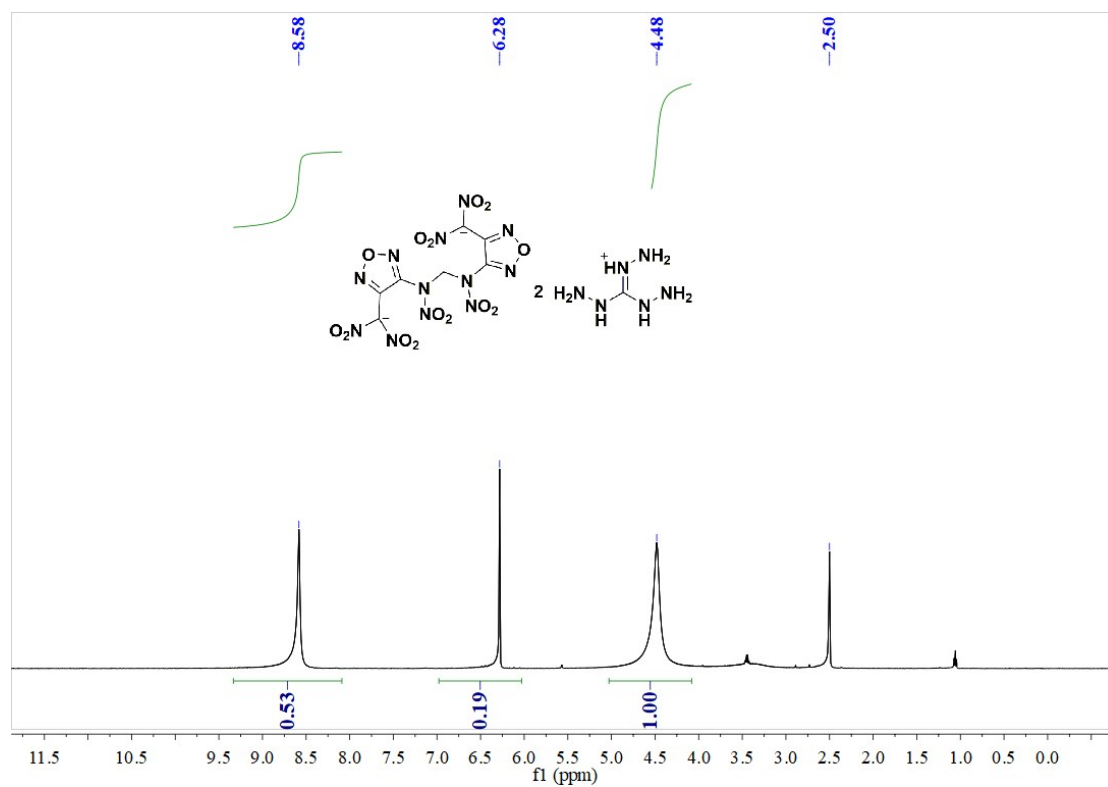

Fig S14 <sup>1</sup>H-NMR spectrum of **8** in *d*<sub>6</sub>-DMSO.



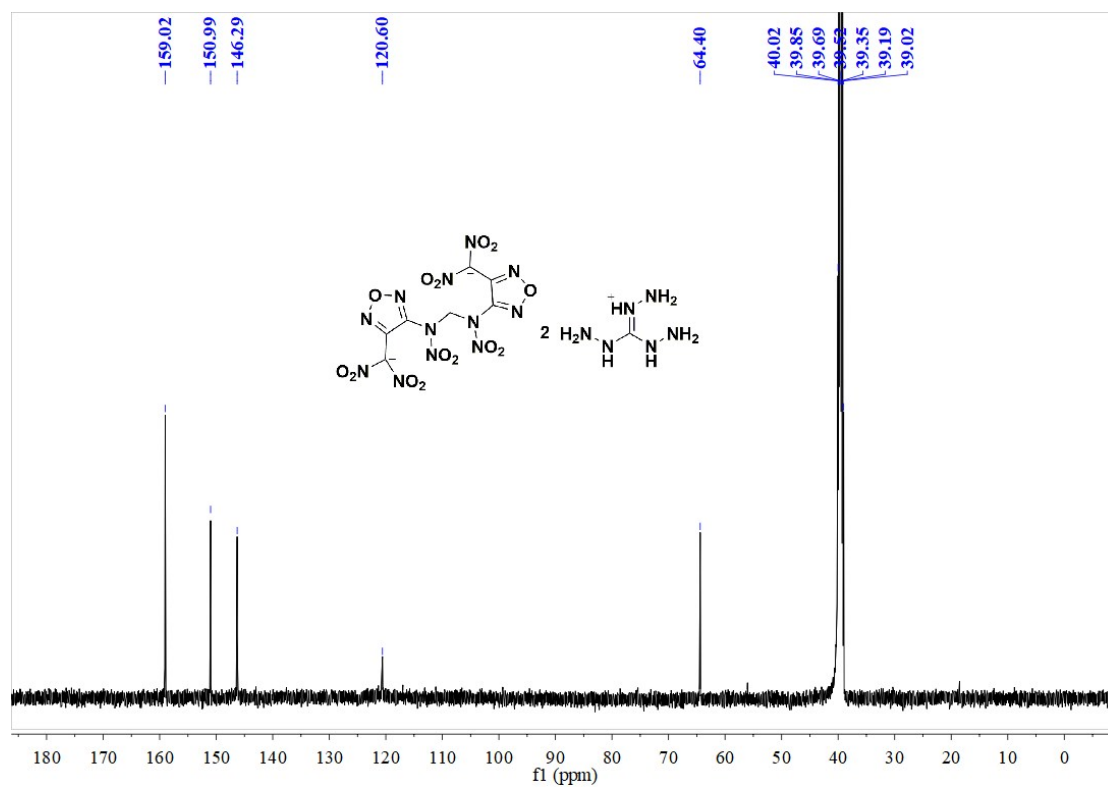

Fig S15  $^{13}\text{C}$ -NMR spectrum of 8 in  $d_6$ -DMSO.

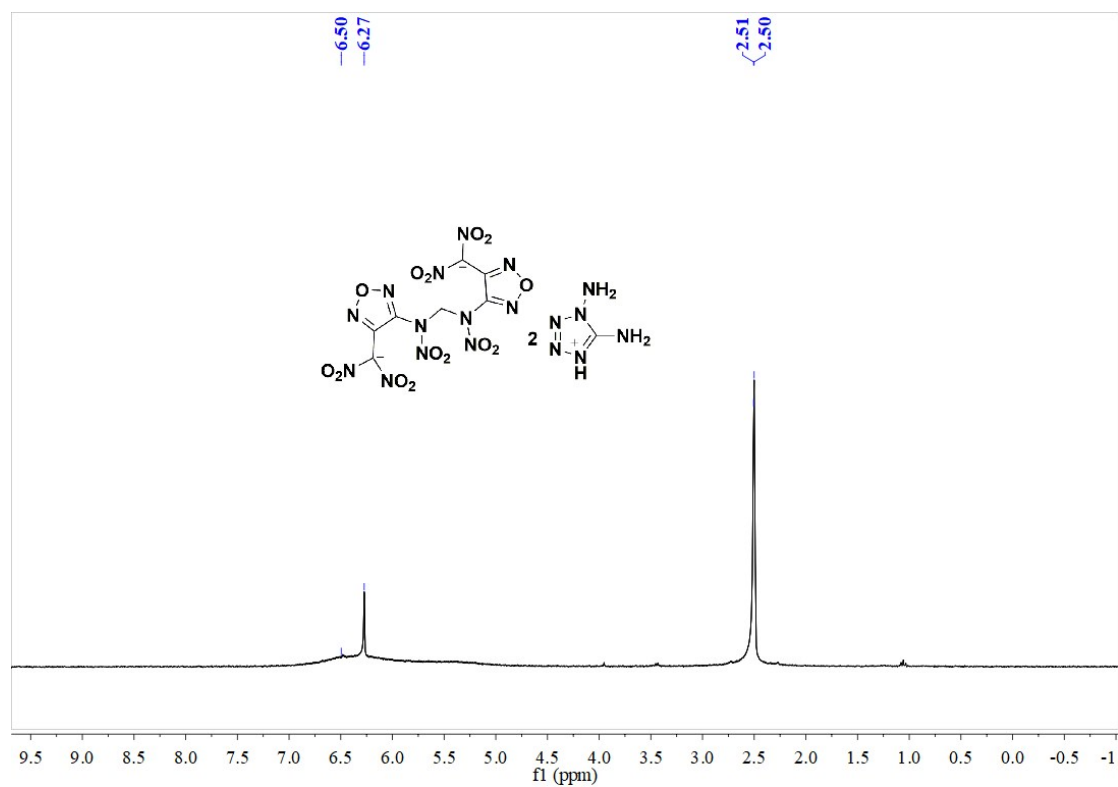

Fig S16  $^1\text{H}$ -NMR spectrum of 9 in  $d_6$ -DMSO.

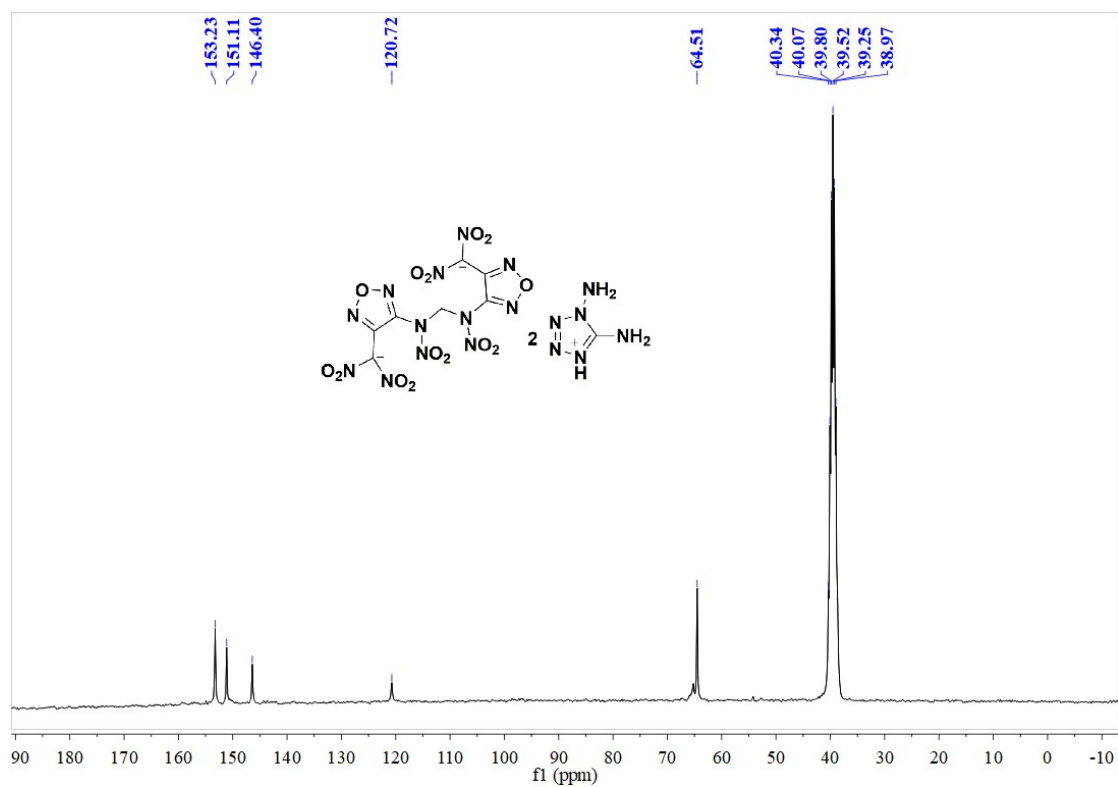

Fig S17  $^{13}\text{C}$ -NMR spectrum of **9** in  $d_6$ -DMSO.

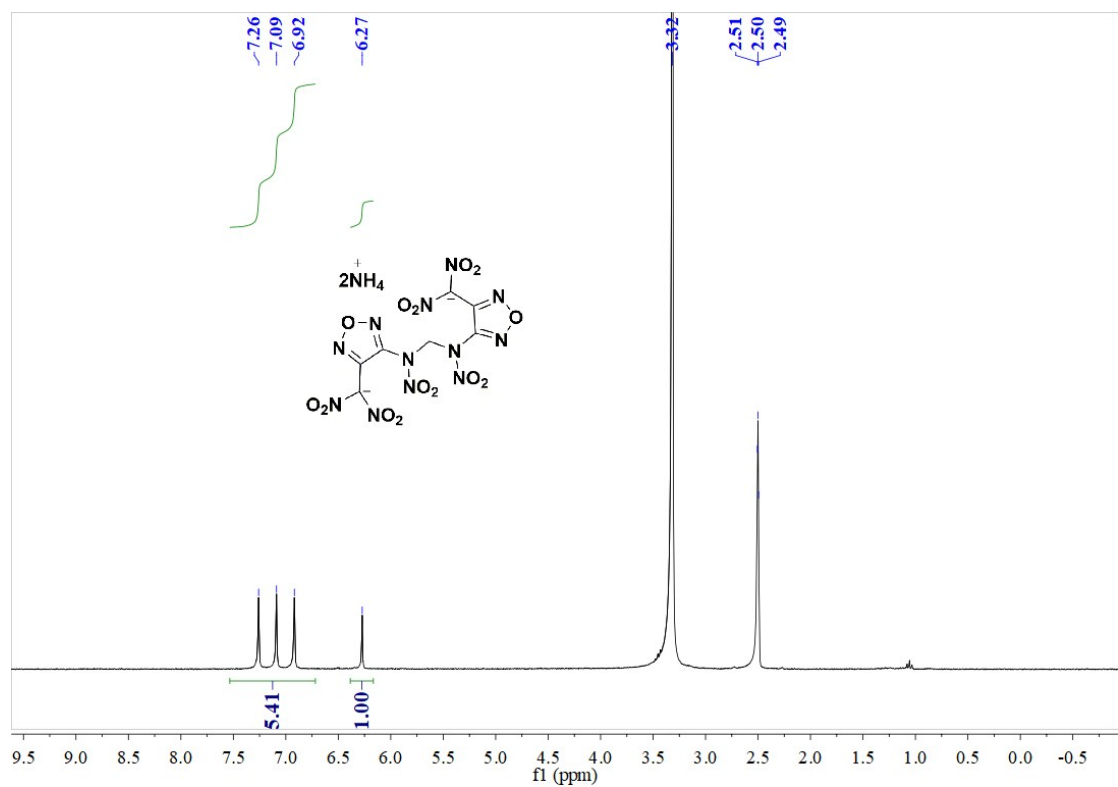

Fig S18  $^1\text{H}$ -NMR spectrum of **10** in  $d_6$ -DMSO.

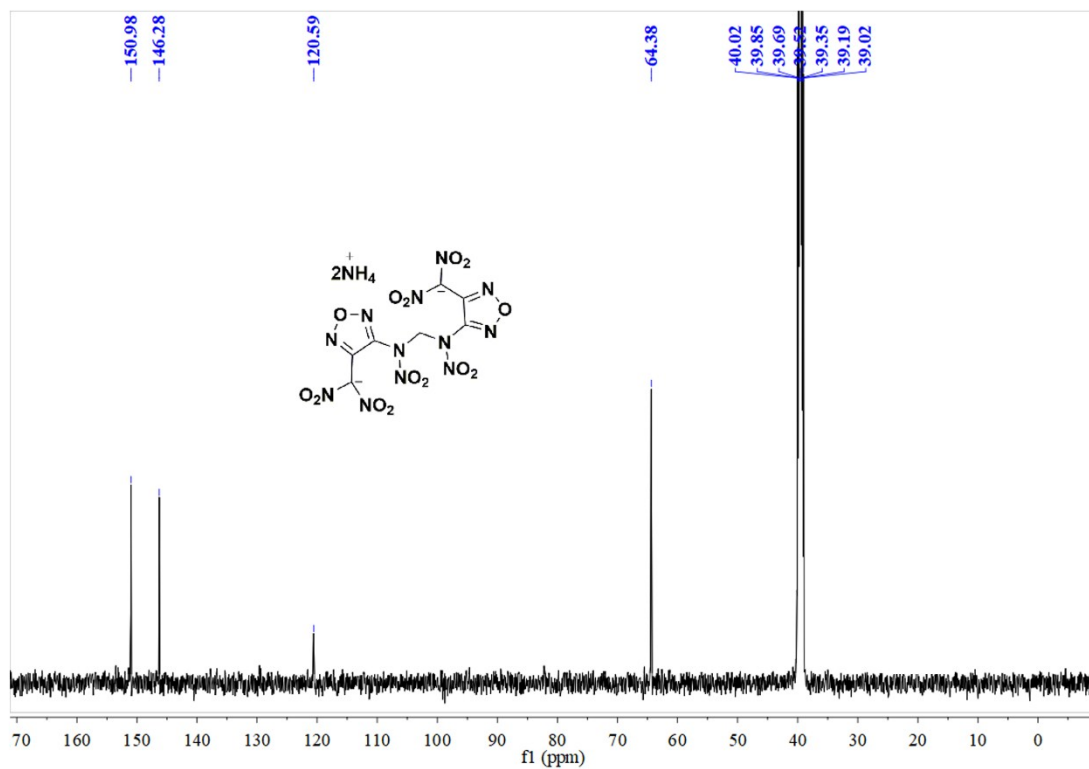

Fig S19 <sup>13</sup>C-NMR spectrum of **10** in *d*<sub>6</sub>-DMSO.

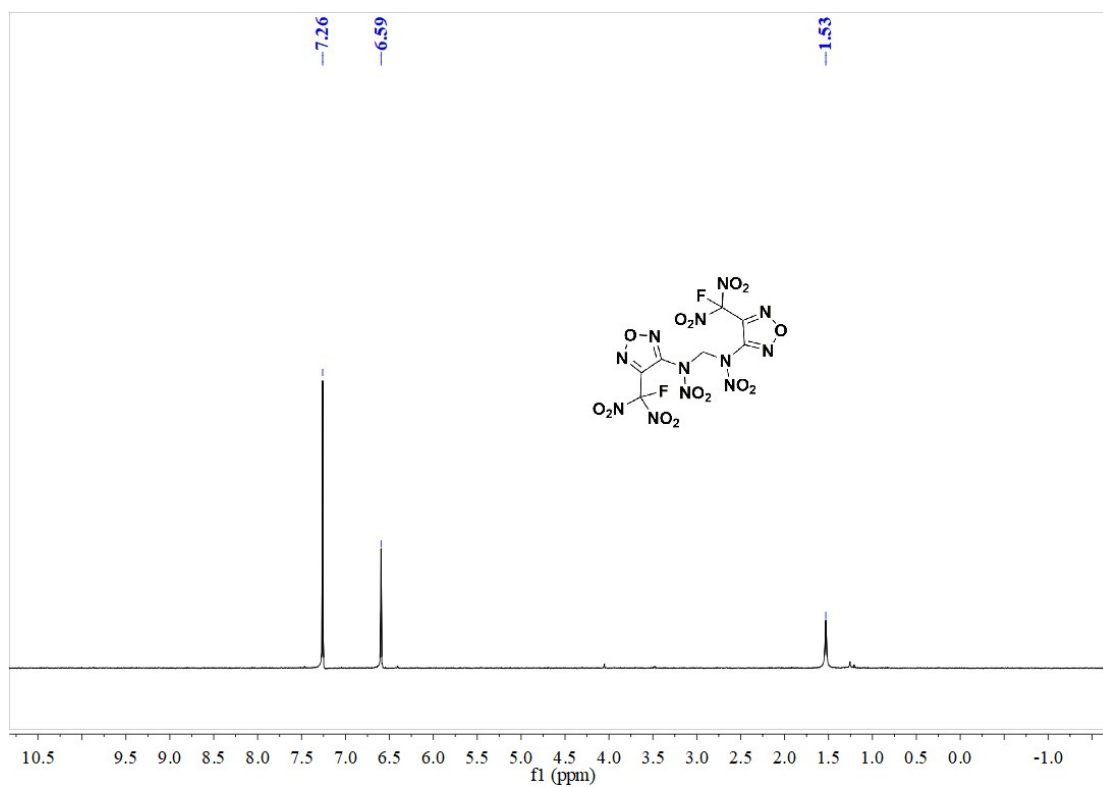

Fig S20 <sup>1</sup>H-NMR spectrum of **11** in *d*<sub>6</sub>-DMSO.

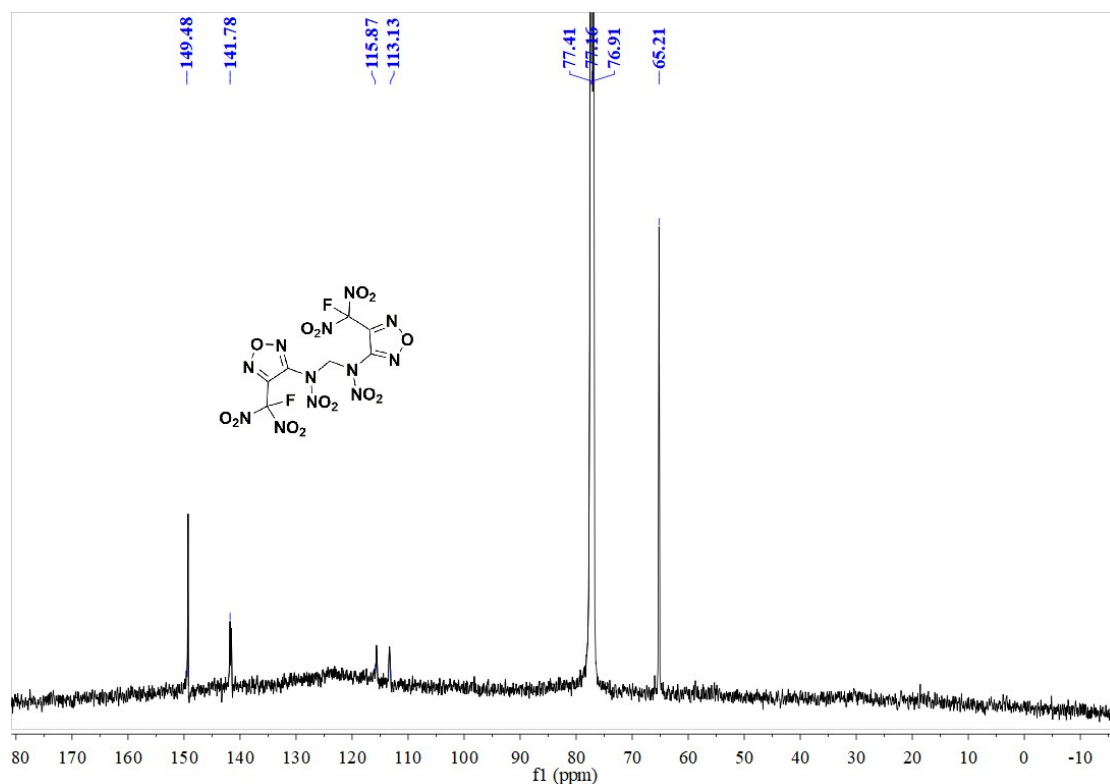

Fig S21  $^{13}\text{C}$ -NMR spectrum of **11** in  $d_6$ -DMSO.

## Reference

- 1 Gaussian 03 (Revision E.01), M. J. Frisch, G. W. Trucks, H. B. Schlegel, G. E. Scuseria, M. A. Robb, J. R. Cheeseman, J. A. Montgomery, Jr., T. Vreven, K. N. Kudin, J. C. Burant, J. M. Millam, S. S. Iyengar, J. Tomasi, V. Barone, B. Mennucci, M. Cossi, G. Scalmani, N. Rega, G. A. Petersson, H. Nakatsuji, M. Hada, M. Ehara, K. Toyota, R. Fukuda, J. Hasegawa, M. Ishida, T. Nakajima, Y. Honda, O. Kitao, H. Nakai, M. Klene, X. Li, J. E. Knox, H. P. Hratchian, J. B. Cross, V. Bakken, C. Adamo, J. Jaramillo, R. Gomperts, R. E. Stratmann, O. Yazyev, A. J. Austin, R. Cammi, C. Pomelli, J. W. Ochterski, P. Y. Ayala, K. Morokuma, G. A. Voth, P. Salvador, J. J. Dannenberg, V. G. Zakrzewski, S. Dapprich, A. D. Daniels, M. C. Strain, O. Farkas, D. K. Malick, A. D. Rabuck, K. Raghavachari, J. B. Foresman, J. V. Ortiz, Q. Cui, A. G. Baboul, S. Clifford, J. Cioslowski, B. B. Stefanov, G. Liu, A. Liashenko, P. Piskorz, I. Komaromi, R. L. Martin, D. J. Fox, T. Keith, M. A. Al-Laham, C. Y. Peng, A. Nanayakkara, M. Challacombe, P. M. W. Gill, B. Johnson, W. Chen, M. W. Wong, C. Gonzalez and J. A. Pople, Gaussian, Inc. Wallingford CT, 2004.
- 2 R. G. Parr and W. Yang, *Density Functional Theory of Atoms and Molecules*, Oxford University Press, New York, 1989.

- 3 M. Head-Gordon and J. A. Pople, *Chem. Phys. Lett.*, 1988, **153**, 503–506.
- 4 Martin, J. M. *Chem. Phys. Lett.*, 1996, **259**, 669–678.
- 5 P. J. Linstrom and W. G. Mallard, Eds. NIST Chemistry WebBook, NIST Standard Reference Database, 69, National Institute of Standards and Technology, 2005.
